# Supplementary material for: Effect of cancer on outcome of COVID-19 patients: a systematic review and meta-analysis of studies of unvaccinated patients
Source: eLife journal article supplement (doi:10.7554/elife.74634), 2022-02-09

Figure 7 – Figure Supplement 1 Hematological tumors: Outcome 2 (access to ICU), 3 (Hospitalization), 4 (Severity of Symptoms)

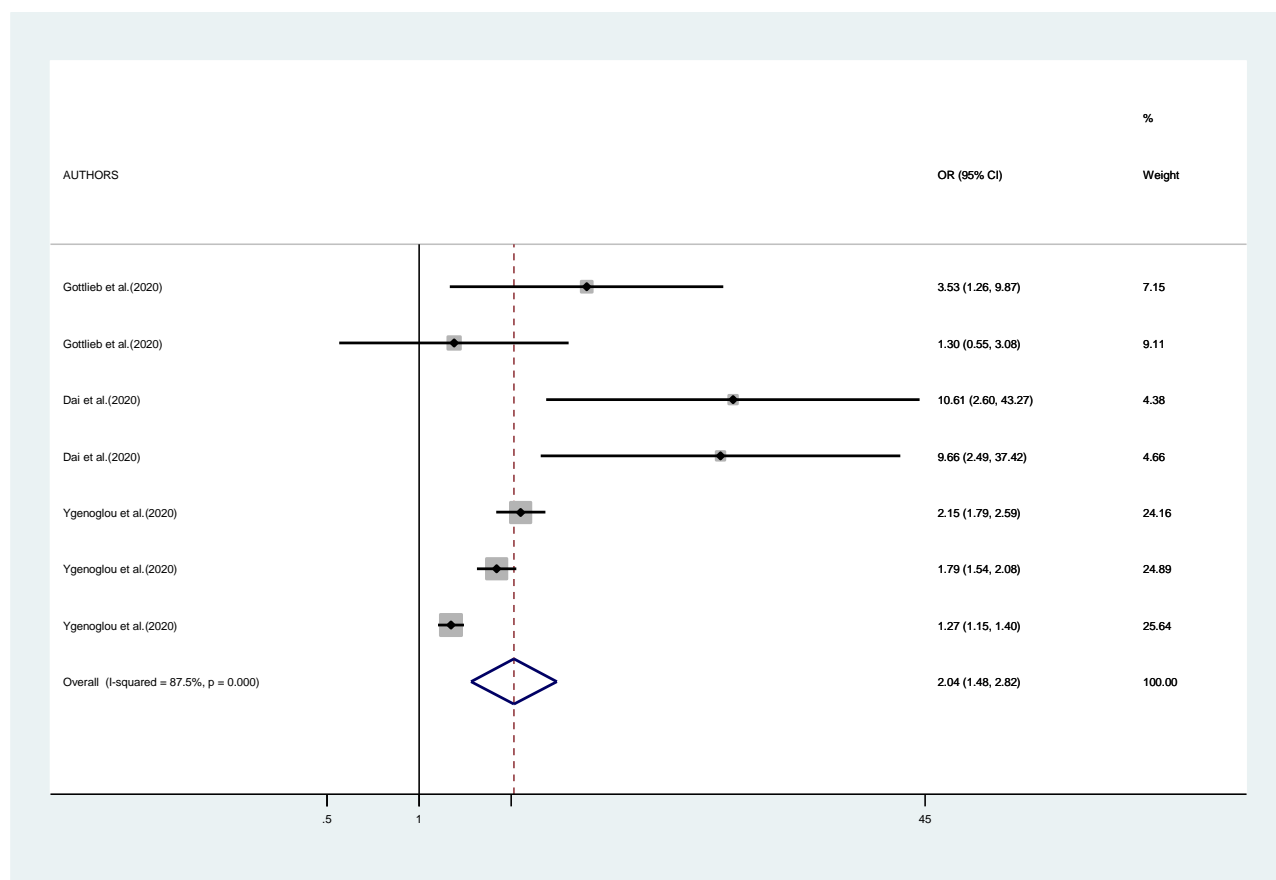

Supplement: supp [file elife-74634-supp-v1.zip]
